# Supplementary material for: Omics-Based Study of Salt-Alkali Stress Mechanisms in Mountain Peach (Prunus davidiana Carr.) in Northwest China
Source: Research Square preprint supplement (doi:10.21203/rs.3.rs-8437815/v1), 2026-01-21
Supplement: Supplementary file 1 [file 0ad3f47d93ca2e6719b72dd4.docx]

**Table. S1**. Effects of salt stress on leaf structural parameters of mountain peach and hairy peach rootstocks

| **Sample** | **Fence tissue thickness (μm)** | **Spongy tissue thickness (μm)** | **Blade thickness (μm)** | **CTR%** | **SR%** |
| --- | --- | --- | --- | --- | --- |
| MT_CK | 50.37±3.59a | 42.20±1.89c | 115.97±0.48b | 43.47% | 36.38% |
| MT_T1 | 52.07±0.52a | 45.67±0.88bc | 121.63±4.24b | 42.80% | 37.54% |
| MT_T2 | 52.43±3.39a | 49.07±0.29ab | 124.80±3.71b | 42.01% | 39.31% |
| MT_T3 | 56.20±7.37a | 54.00±3.05a | 134.40±0.90a | 41.81% | 40.17% |
| ST_CK | 59.23±3.19b | 48.00±2.17b | 115.97±0.48b | 51.07% | 41.39% |
| ST_T1 | 61.57±4.65b | 54.50±4.53ab | 150.53±0.83a | 40.90% | 40.90% |
| ST_T2 | 67.83±1.92ab | 61.83±4.10a | 151.70±1.85a | 44.71% | 40.69% |
| ST_T3 | 74.50±1.25a | 66.67±3.67ab | 153.67±1.09a | 48.48% | 43.38% |

**Note:** Different lowercase letters indicate significant differences (*P < 0.05*), while identical lowercase letters indicate no statistically significant differences.

**Table. S2**. Assessment of transcriptome sequencing data quality for mountain peach and hairy peach rootstock cultivars

| **Group** | **Sample** | **Clean reads** | **Clean bases** | **GC content (%)** | **Q20 (%)** | **Q30 (%)** |
| --- | --- | --- | --- | --- | --- | --- |
| MT_CK | MT_CK_1 | 40,861,352 | 6.13 G | 45.40 | 98.77 | 97.07 |
| MT_CK_2 | 43,355,102 | 6.50 G | 45.38 | 98.54 | 97.28 |
| MT_CK_3 | 43,216,106 | 6.48 G | 45.52 | 98.81 | 96.89 |
| MT_T1 | MT_T1_1 | 43,484,544 | 6.52 G | 45.45 | 98.82 | 96.82 |
| MT_T1_2 | 41,682,004 | 6.25 G | 45.48 | 98.62 | 97.41 |
| MT_T1_3 | 42,806,780 | 6.42 G | 45.37 | 98.45 | 97.12 |
| MT_T2 | MT_T2_1 | 41,245,976 | 6.19 G | 45.50 | 99.17 | 96.83 |
| MT_T2_2 | 45,400,528 | 6.81 G | 45.83 | 99.32 | 97.37 |
| MT_T2_3 | 41,724,774 | 6.26 G | 46.10 | 99.26 | 97.21 |
| MT_T3 | MT_T3_1 | 42,217,094 | 6.33 G | 45.95 | 99.39 | 97.90 |
| MT_T3_2 | 49,162,884 | 7.37 G | 46.01 | 99.27 | 97.46 |
| MT_T3_3 | 42,616,806 | 6.39 G | 45.92 | 99.26 | 97.47 |
| ST_CK | ST_CK_1 | 41,821,326 | 6.27 G | 45.57 | 99.30 | 97.61 |
| ST_CK_2 | 43,577,452 | 6.54 G | 45.15 | 99.36 | 97.65 |
| ST_CK_3 | 42,420,974 | 6.36 G | 45.28 | 98.81 | 97.18 |
| ST_T1 | ST_T1_1 | 44,696,604 | 6.70 G | 45.61 | 98.93 | 97.71 |
| ST_T1_2 | 42,275,604 | 6.34 G | 45.69 | 99.30 | 97.37 |
| ST_T1_3 | 44,579,284 | 6.69 G | 45.31 | 99.35 | 97.59 |
| ST_T2 | ST_T2_1 | 54,442,696 | 8.17 G | 45.56 | 99.16 | 96.92 |
| ST_T2_2 | 41,638,834 | 6.25 G | 45.67 | 99.26 | 97.43 |
| ST_T2_3 | 43,966,788 | 6.60 G | 45.58 | 99.23 | 97.33 |
| ST_T3 | ST_T3_1 | 41,446,076 | 6.22 G | 45.56 | 99.19 | 97.05 |
| ST_T3_2 | 40,407,148 | 6.06 G | 45.50 | 98.77 | 97.22 |
| ST_T3_3 | 45,120,470 | 6.77 G | 45.60 | 99.01 | 97.49 |

**Table. S3** Comparative Analysis of salt stress-responsive pathways between mountain peach and hairy peach

| **Rootstock** | **Passageway Name** | **KEGG ID** | **Gene ID** |
| --- | --- | --- | --- |
| mountain peach | Glutathione metabolism | map00480 | PRUPE_8G210200/PRUPE_1G456300/ PRUPE_8G210400 |
| mountain peach | Nitrogen metabolism | map00910 | PRUPE_4G263400/ PRUPE_8G025400 |
| mountain peach | Pyruvate metabolism | map00620 | PRUPE_3G012300/ PRUPE_8G207100/ PRUPE_6G210900 |
| hairy peach | Flavonoid biosynthesis | map00941 | PRUPE_3G095000/ PRUPE_3G101900/ PRUPE_3G101500/ PRUPE_1G580300/ PRUPE_1G003000/ PRUPE_1G237100/ PRUPE_2G263900/ PRUPE_1G547800 |
| hairy peach | Cutin, suberine and wax biosynthesis | map00073 | PRUPE_6G126700/ PRUPE_6G126800/ PRUPE_2G086300/ PRUPE_2G112600/ PRUPE_1G391500/ PRUPE_5G147300/ PRUPE_6G126900 |
| hairy peach | Plant-pathogen interaction | map04626 | / PRUPE_2G167700/ PRUPE_4G123000/ PRUPE_6G199700/ PRUPE_4G123100/ PRUPE_8G008700/ PRUPE_1G457900/ PRUPE_2G103600 |

**Table. S4.** qRT-PCR primer list

| **Gene name** | **Primer** | **Sequence (5’-3’)** |
| --- | --- | --- |
| *ACTIN* | Forward primer | GATTCCGGTGCCCAGAAGT |
| Reverse primer | CCAGCAGCTTCCATTCCAA |
| 18782836 | Forward primer | CCACATCCTCAAGTACCTCAAA |
| Reverse primer | GAGGCAGATGGAGTTTCATACA |
| 18770065 | Forward primer | GTGCGAGGATTTGAGCTTATTG |
| Reverse primer | GGGTTGCGAGGGTTATGAT |
| 18771703 | Forward primer | GCATCATAGACGACCACATACA |
| Reverse primer | GCCAACAATTCATCGACCATATC |
| 18787140 | Forward primer | GGAGTGGCCATTGAAGAGTAA |
| Reverse primer | GCCTCATCGACAGTCATACAA |
| 18789827 | Forward primer | CTGAAGCCACAGGAGTTTCT |
| Reverse primer | CGGCATCAACAATGGGTTTC |
| 18770065 | Forward primer | GTGCGAGGATTTGAGCTTATTG |
| Reverse primer | GGGTTGCGAGGGTTATGAT |
